# Supplementary material
Source: PubMed Central journal article supplement (PMC5291017)
Supplement: supp_pp.16.01734_PP2016-01068DR1_Supplemental_Material_1.pdf [file supp_pp.16.01734_PP2016-01068DR1_Supplemental_Material_1.pdf]

1

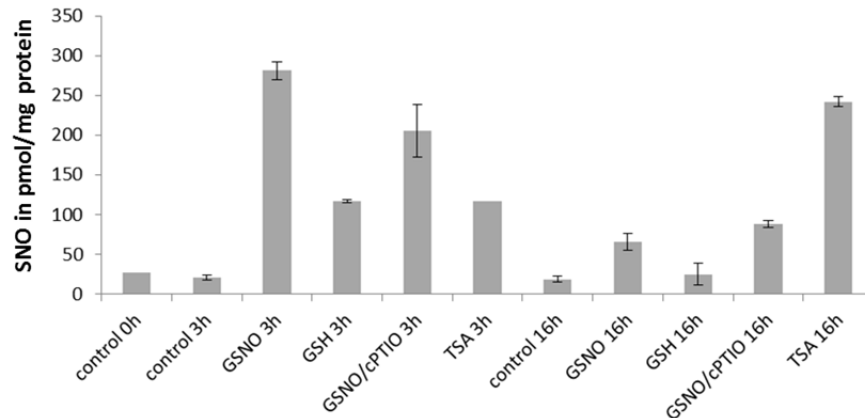

2

3 **Supplemental Figure 1: S-Nitrosothiol levels in liquid grown *Arabidopsis* seedlings after**  
 4 **GSNO, GSH, GSNO/cPTIO, TSA and water (control) treatment.** Seedlings were treated with  
 5 250  $\mu$ M GSNO, 250  $\mu$ M GSH, 250  $\mu$ M GSNO / 500  $\mu$ M cPTIO, 5  $\mu$ M TSA or water (control)  
 6 and total S-nitrosothiol levels were determined after 3h and 16h. SNOs were reduced with  
 7 triiodide and the emitted NO was photochemically detected by its reaction with ozone.

8

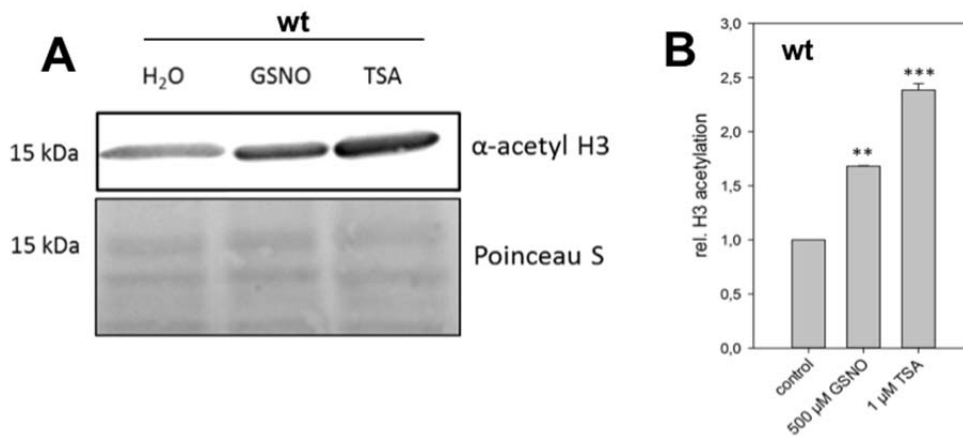

9

10 **Supplemental Figure 2: GSNO increases H3ac in *Arabidopsis* suspension cells.** A) Western-  
 11 Blot analysis of GSNO- and TSA-treated wild-type cells. Nuclear extracts were separated by  
 12 SDS-PAGE and blotted. The membrane was probed with an anti-acetyl H3 primary antibody and  
 13 a secondary antibody coupled to HRP. Shown is one representative experiment. B)  
 14 Quantification of A. Signal intensity was determined with Image J software. Shown is the mean  
 15  $\pm$  SEM of three experiments. \*\*P < 0.01, \*\*\*P < 0.001, student's t-test.

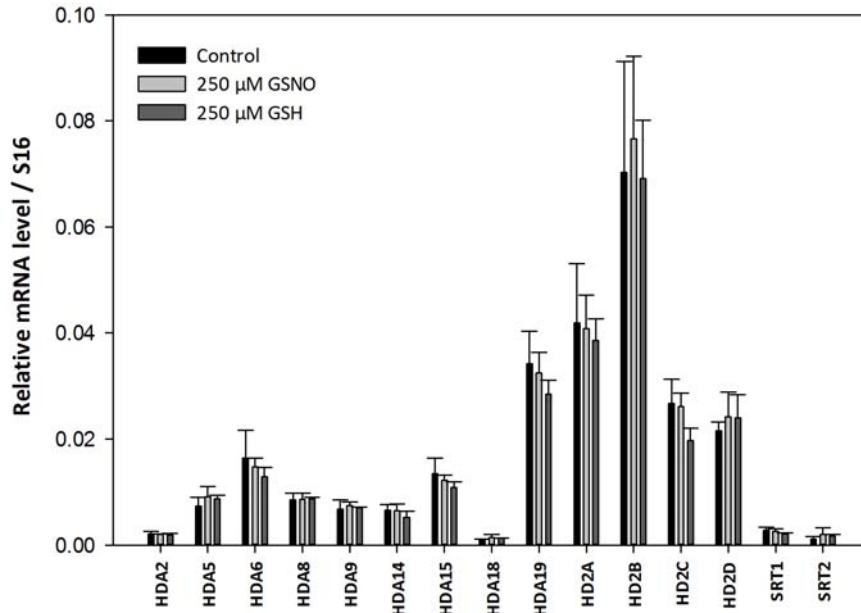

16

17 **Supplemental Figure 3: mRNA levels of HDACs after GSNO and GSH treatment.** mRNA  
 18 levels were determined by qPCR using gene-specific primer pairs. Values are expressed as mean  
 19  $\pm$  SD of three independent experiments, normalized to S16 mRNA level.

20

21

22

23

24

25

26

27

28

29

30

31

32

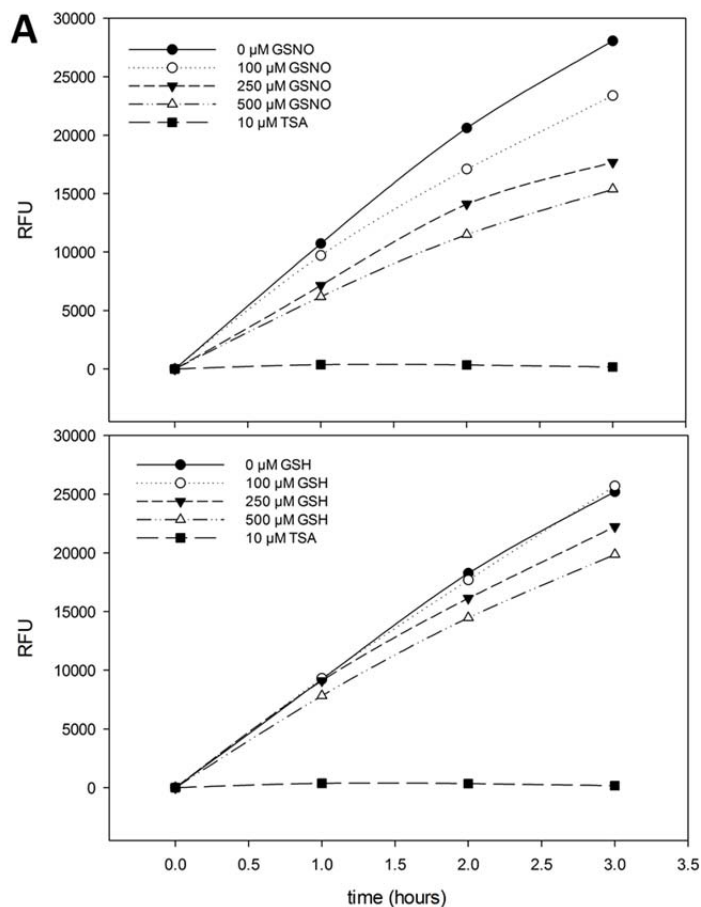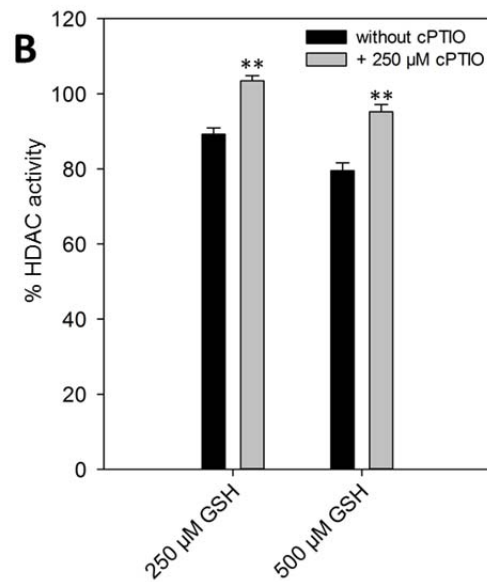

33

34 **Supplemental Figure 4: Inhibition of HDAC activity by GSH.** A) Protoplasts were stimulated  
 35 with 100 μM, 250 μM and 500 μM GSNO or GSH and HDAC activity was recorded for 3h.  
 36 Specificity of the assay was demonstrated by using TSA, a strong HDAC inhibitor. Shown is one  
 37 representative experiment out of two. B) HDAC inhibition by GSH can be prevented by cPTIO.  
 38 Protoplasts were preincubated with cPTIO and then stimulated with 250 μM and 500 μM GSH.  
 39 HDAC activity was recorded after 2h. Values are normalized to water treated (- cPTIO) or  
 40 cPTIO treated (+ cPTIO) protoplasts. Shown is the mean ± SEM of three independent protoplast  
 41 preparations. \*\*P < 0.01, student's t-test.

42

43

44

45

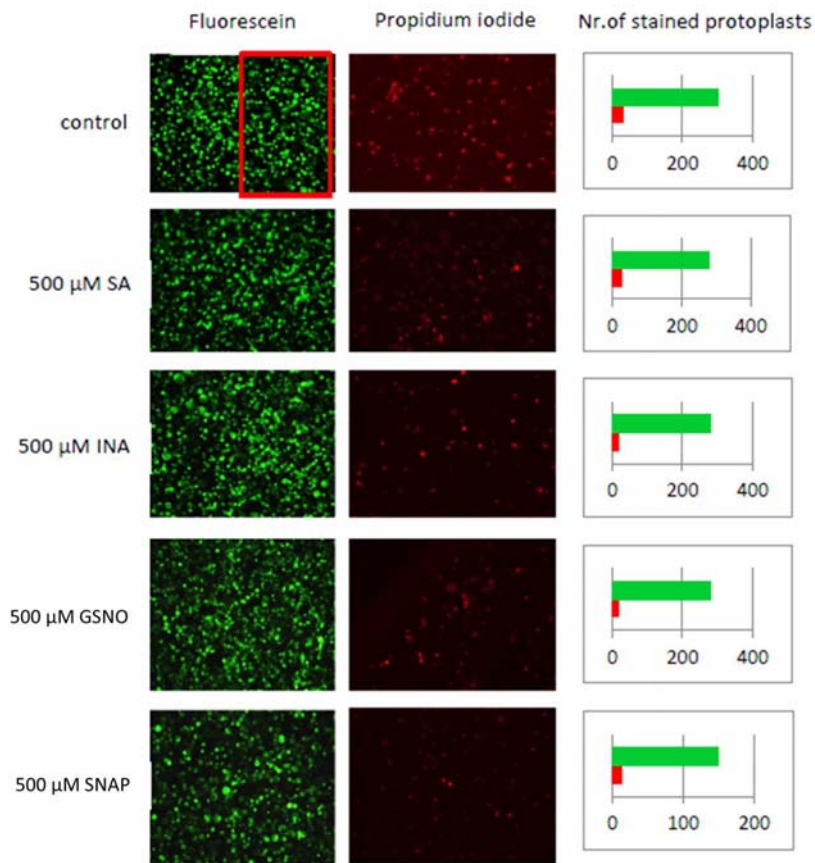

46

47 **Supplemental Figure 5: Viability of protoplasts after SA, INA, GSNO and SNAP**  
 48 **treatment.** Protoplasts were stained simultaneously with fluorescein diacetate and propidium  
 49 iodide. Viable (accumulation of fluorescein in the cytosol, green) and non - viable (accumulation  
 50 of propidium iodide in the nucleus, red) cells were counted in one half of the images (red  
 51 square), the respective numbers are depicted in the diagrams on the right. Green bars represent  
 52 viable, red bars represent non-viable cells.

53

54

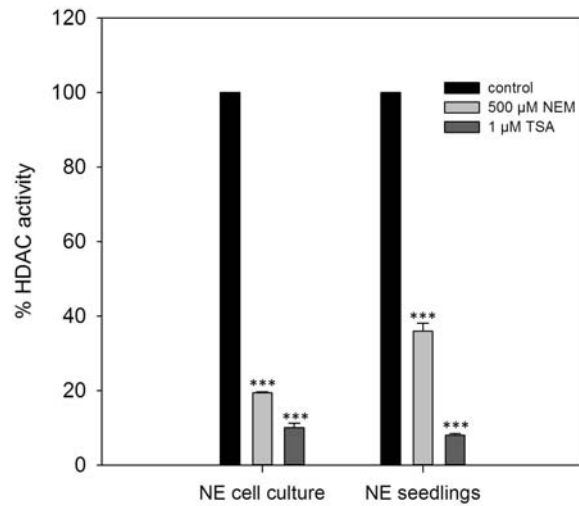

55

56 **Supplemental Figure 6: Inhibition of nuclear HDAC activity by NEM and TSA.** Nuclear  
 57 extracts (NE) from *Arabidopsis* suspension cells or liquid grown seedlings (7 days) were treated  
 58 with 500  $\mu$ M NEM. 1  $\mu$ M TSA was used as a positive control. Values are mean  $\pm$  SEM of three  
 59 independent preparations of nuclear extracts and normalized to control treatment. \*\*\*P < 0.001,  
 60 Student's t-test.

61

62

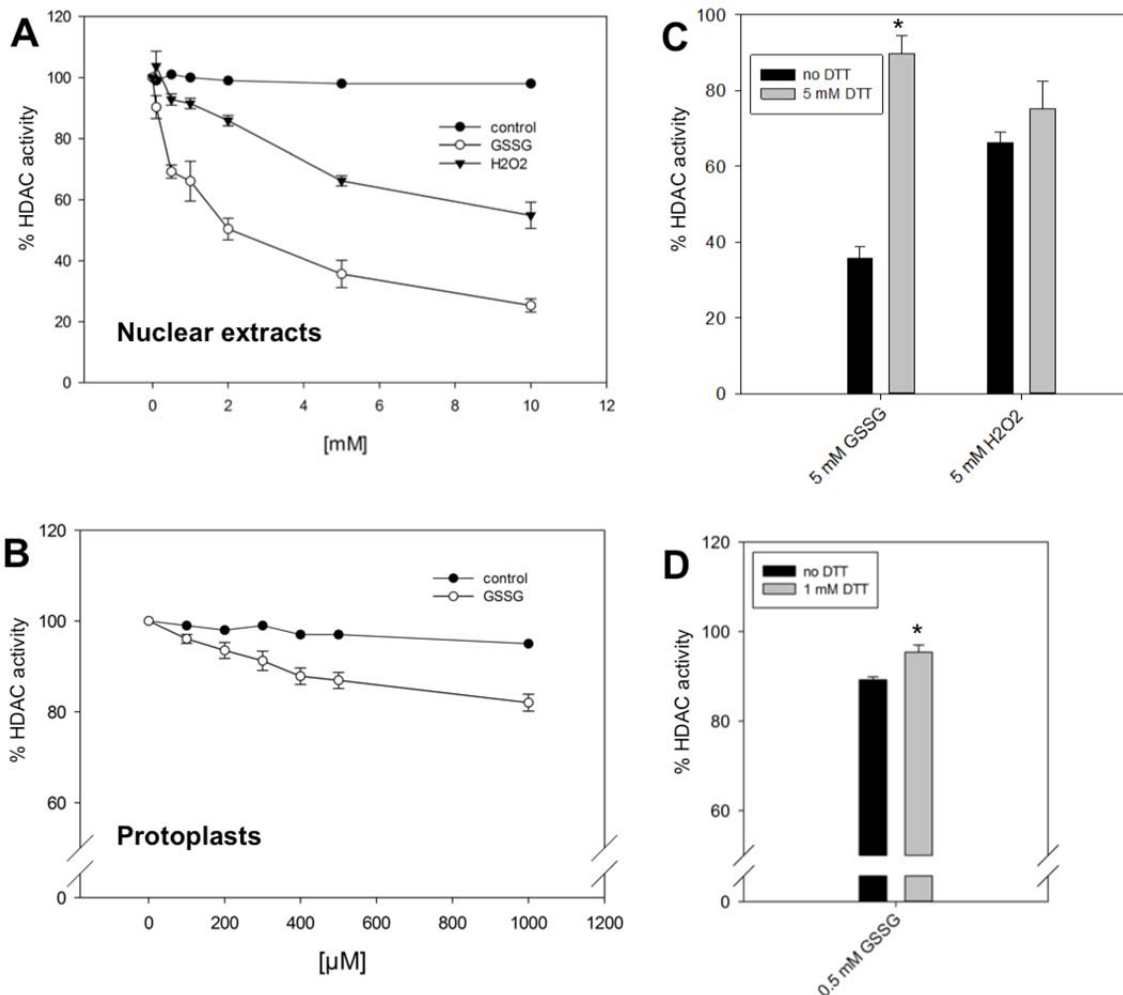

63

64 **Supplemental Figure 7: Inhibition of HDAC activity by GSSG and H<sub>2</sub>O<sub>2</sub>.** A) Nuclear  
 65 extracts from *A. thaliana* cell culture were incubated with different concentrations of GSSG and  
 66 H<sub>2</sub>O<sub>2</sub>. B) Protoplasts from *A. thaliana* cell culture were treated with GSSG. C and D) DTT  
 67 restored HDAC activity after GSSG but not H<sub>2</sub>O<sub>2</sub> treatment. Nuclear extracts and protoplasts  
 68 were incubated with DTT after GSSG and H<sub>2</sub>O<sub>2</sub> addition. Values are expressed as percentage of  
 69 HDAC activity in untreated nuclear extracts or protoplasts. Values are mean ± SEM of three  
 70 independent preparations of nuclear extract or protoplasts. \* P < 0.05, student's t-test.

71

72

73

74

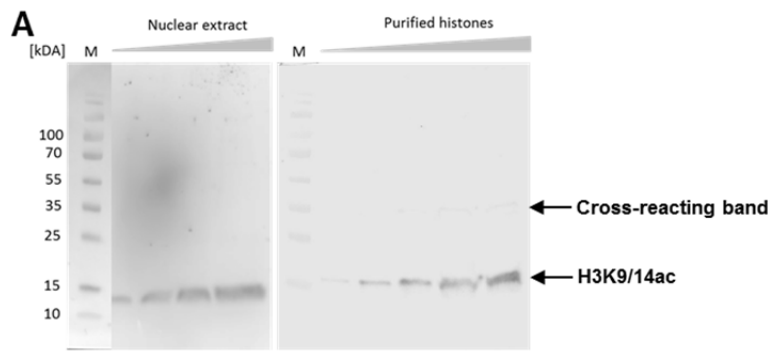

75

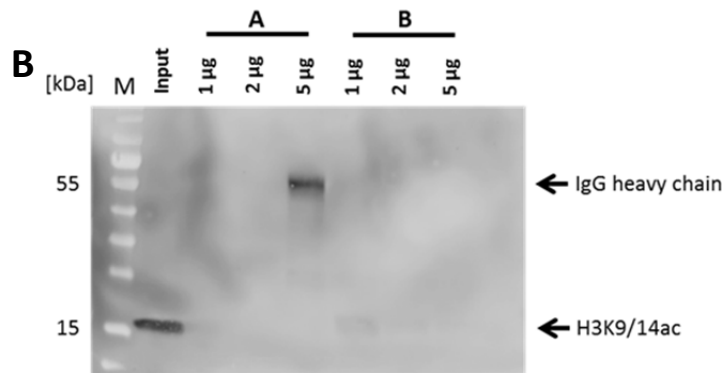

A: supernatants after coupling reaction

B: supernatants after IP

76

77 **Supplemental Figure 8: Antibody quality control and titration.** Different quantities of  
 78 nuclear extracts and purified histones were separated by 12 % SDS-PAGE, blotted on  
 79 nitrocellulose and probed with an anti-H3K9/14ac antibody (Diagenode). Secondary antibodies  
 80 were anti-rabbit-IgG-HRP (Promega, nuclear extracts) and anti-rabbit-AP (Promega, purified  
 81 histones). The antibody was highly specific and only very weakly cross-reacted with H1,  
 82 fulfilling the ENCODE criteria for ChIP-seq antibodies. B) Titration experiment to determine the  
 83 optimal amount of antibody. 1, 2 and 5 µg of anti-H3K9/14ac antibody were coupled to magnetic  
 84 beads and aliquots of the supernatants after the coupling reaction (to assess the success of the  
 85 coupling reaction) as well as after the immunoprecipitation (to check whether all antigen was  
 86 immunoprecipitated) were probed with the same antibody. Sheared chromatin (input) was used  
 87 as positive control. In these experiments chromatin was isolated from 2 g of starting material, for  
 88 subsequent experiments only 1 g of material was used. Therefore, although a slight band is  
 89 visible in lane 6, 1 µg of antibody was sufficient to immunoprecipitate all of the antigen present  
 90 in the sample prepared from 1 g of tissue.

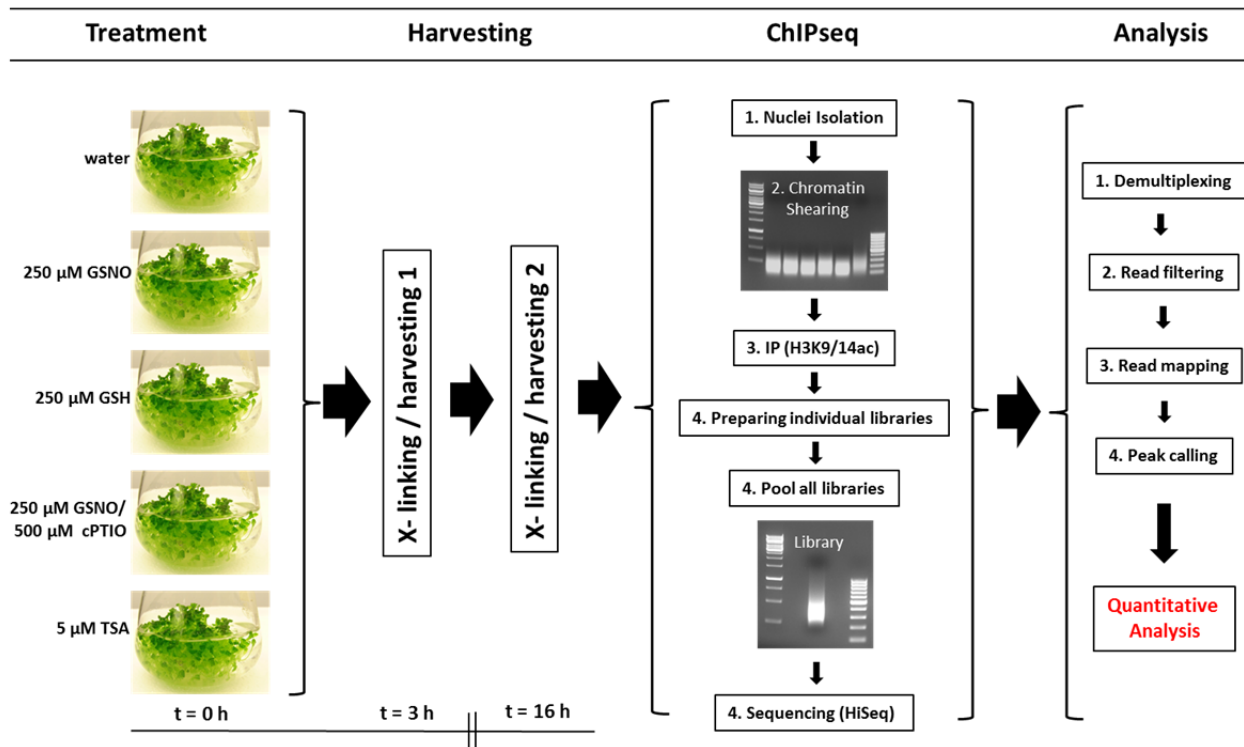

91

92 **Supplemental Figure 9: Workflow to quantitatively determine differences in the**  
 93 **H3K9/14ac pattern after GSNO, GSH, GSNO/cPTIO and TSA treatment.** Liquid grown  
 94 *Arabidopsis* seedlings were treated with water (control), 250  $\mu$ M GSNO, 250  $\mu$ M GSH, 250  $\mu$ M  
 95 GSNO / 500  $\mu$ M cPTIO and 5  $\mu$ M TSA. 3h and 16h later seedlings were crosslinked and  
 96 harvested. ChIP was done with an antibody directed against H3K9/14ac. The experiment was  
 97 performed in two biological replicates. For each sample (in total 20) 1 ng of the  
 98 immunoprecipitated DNA and 1 ng of the corresponding input DNA was used to prepare indexed  
 99 libraries. All libraries were pooled and sequenced. Reads were then demultiplexed, filtered (only  
 100 uniquely mapped reads were kept) and mapped back to the *Arabidopsis* genome (TAIR9).  
 101 Finally, H3K9/14ac peaks were identified and differences in the H3K9/14ac pattern across the  
 102 different treatments were quantified.

103

104



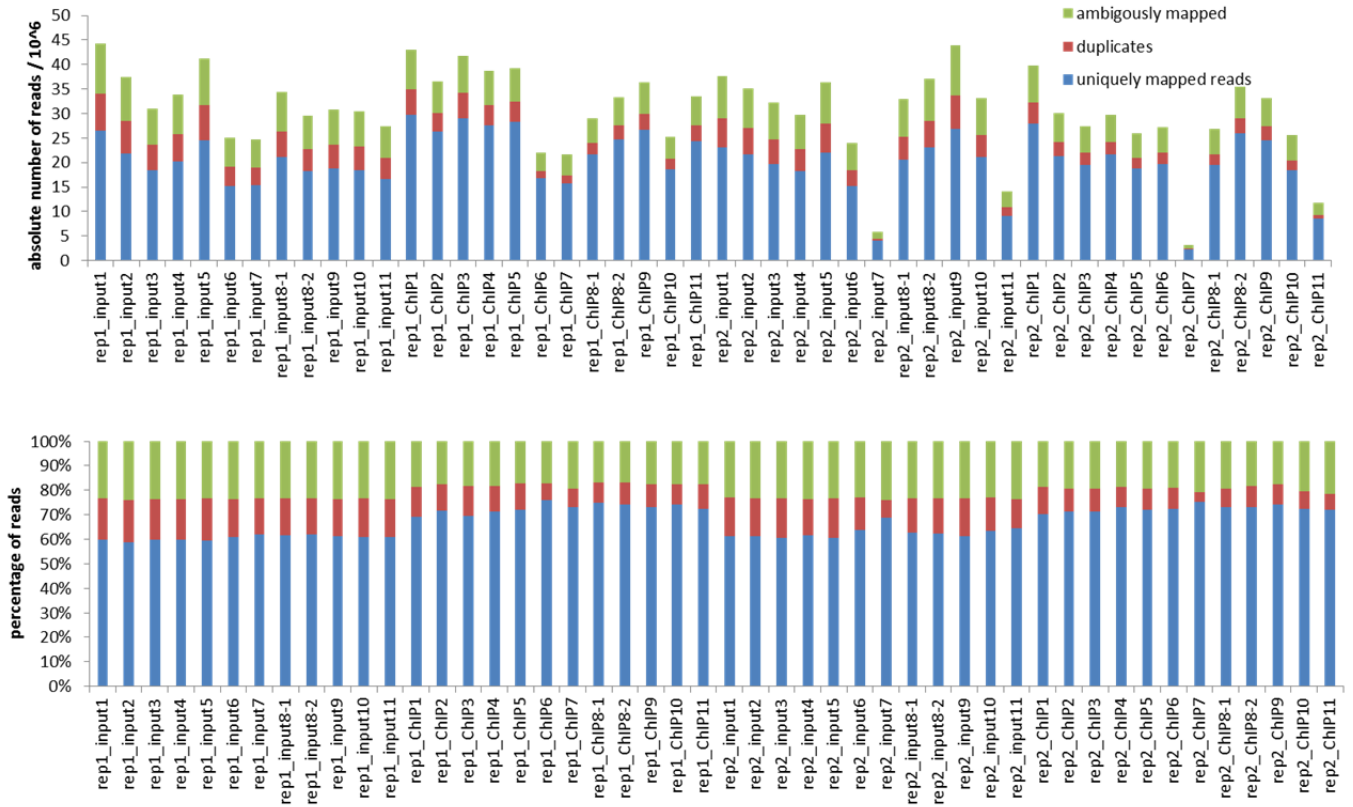

105

106 **Supplemental Figure 10: Summary of read mapping.** Raw reads generated by an Illumina  
 107 HiSeq 2500 were aligned to the *Arabidopsis* reference genome (TAIR10) using the mapping tool  
 108 of the clc genomics workbench (Qiagen) with default settings. Reads that mapped to more than  
 109 one position and duplicate reads originating from PCR artefacts were excluded from further  
 110 analysis. 15 - 30 million uniquely mapping high quality reads per sample were obtained. Due to  
 111 the low number of reads, rep2\_input7 and rep2\_ChIP7 (corresponding to control\_16h) and  
 112 rep2\_input11 and rep2\_ChIP11 (corresponding to TSA\_16h) could not be used for further  
 113 analysis.

114

115

116

| treatment      | name         | # reads  | # peaks | RSC   | NSC   | peaks/reads |
|----------------|--------------|----------|---------|-------|-------|-------------|
| control t = 0  | rep1_ChIP1   | 29683571 | 12784   | 1.009 | 1.131 | 0.000431    |
| control t = 3  | rep1_ChIP2   | 26258106 | 13882   | 1.060 | 1.198 | 0.000529    |
| GSNO t = 3     | rep1_ChIP3   | 29101321 | 13521   | 1.055 | 1.174 | 0.000465    |
| GSH t = 3      | rep1_ChIP4   | 27597269 | 12979   | 1.038 | 1.174 | 0.000470    |
| cPTIO t = 3    | rep1_ChIP5   | 28241039 | 13573   | 1.054 | 1.185 | 0.000481    |
| TSA t = 3      | rep1_ChIP6   | 16785680 | 13627   | 1.021 | 1.242 | 0.000812    |
| control t = 16 | rep1_ChIP7   | 15793934 | 6838    | 1.006 | 1.176 | 0.000433    |
| GSNO t = 16    | rep1_ChIP8-1 | 21722687 | 13484   | 1.068 | 1.241 | 0.000621    |
| GSNO t = 16    | rep1_ChIP8-2 | 24695272 | 14182   | 1.072 | 1.232 | 0.000574    |
| GSH t = 16     | rep1_ChIP9   | 26653757 | 13802   | 1.056 | 1.187 | 0.000518    |
| cPTIO t = 16   | rep1_ChIP10  | 18674559 | 10701   | 1.010 | 1.197 | 0.000573    |
| TSA t = 16     | rep1_ChIP11  | 24318293 | 14758   | 1.005 | 1.149 | 0.000607    |
| control t = 0  | rep2_ChIP1   | 27871262 | 439     | 0.897 | 1.084 | 0.000016    |
| control t = 3  | rep2_ChIP2   | 21377496 | 9136    | 0.986 | 1.157 | 0.000427    |
| GSNO t = 3     | rep2_ChIP3   | 19585686 | 7885    | 0.993 | 1.163 | 0.000403    |
| GSH t = 3      | rep2_ChIP4   | 21740591 | 11754   | 1.042 | 1.207 | 0.000541    |
| cPTIO t = 3    | rep2_ChIP5   | 18765809 | 8657    | 1.014 | 1.192 | 0.000461    |
| TSA t = 3      | rep2_ChIP6   | 19730422 | 11119   | 0.973 | 1.170 | 0.000564    |
| control t = 16 | rep2_ChIP7   | 2331035  | 1200    | 0.391 | 1.203 | 0.000515    |
| GSNO t = 16    | rep2_ChIP8-1 | 19546017 | 8572    | 0.999 | 1.167 | 0.000439    |
| GSNO t = 16    | rep2_ChIP8-2 | 25941867 | 9316    | 0.976 | 1.120 | 0.000359    |
| GSH t = 16     | rep2_ChIP9   | 24542001 | 13436   | 1.070 | 1.226 | 0.000547    |
| cPTIO t = 16   | rep2_ChIP10  | 18479068 | 6031    | 1.016 | 1.179 | 0.000326    |
| TSA t = 16     | rep2_ChIP11  | 8469745  | 385     | 0.717 | 1.119 | 0.000045    |

117

118 **Supplemental Figure 11: Summary of peak calling parameters.** The number of called peaks  
119 correlates with the number of reads in each sample. The relative strand cross-correlation (RSC)  
120 describes the ratio between the fragment-length peak and the read-length peak in the cross-  
121 correlation plot. Successful ChIP-experiments have RSC values greater than 0.8. The normalized  
122 strand coefficient describes the ratio between the fragment-length peak and the background  
123 cross-correlation values. This value should be greater than 1.05 for ChIP-seq experiments (CLC  
124 genomics workbench).

125

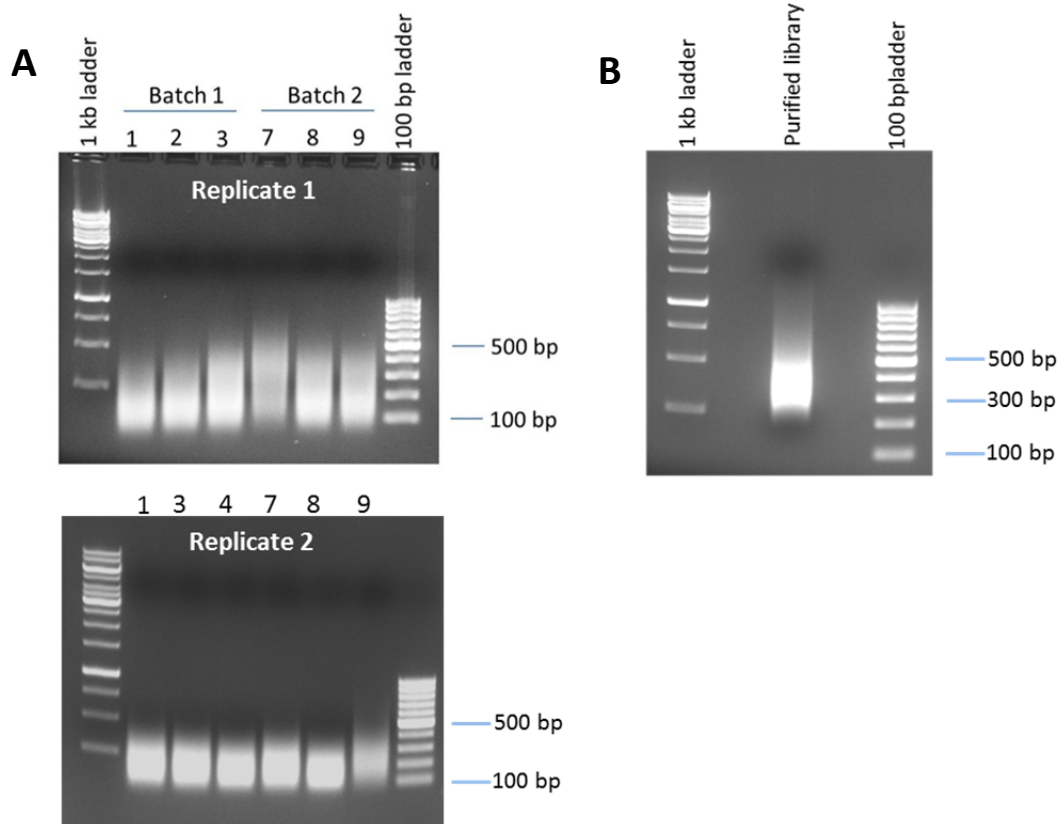

126

127 **Supplemental Figure 12: Shearing and library preparation.** A) Aliquots of sheared  
 128 chromatin were separated on a 1.5% agarose gel and stained with ethidium bromide, revealing  
 129 that the length of the fragments was between 100 and 500 bp, with a maximum at 200 bp. This  
 130 length distribution was optimal for ChIPseq (Landt et al., 2012). B) An aliquot of the final  
 131 pooled library (consisting of 48 individual libraries, see Fig.1, additional technical replicates  
 132 from GSNO treated sample) was separated on a 1.5% agarose gel and stained with ethidium  
 133 bromide. Fragments had an average length of around 350 bp (200 bp DNA fragment + 150 bp  
 134 adapters), demonstrating that library preparation was successful.

135

136

137

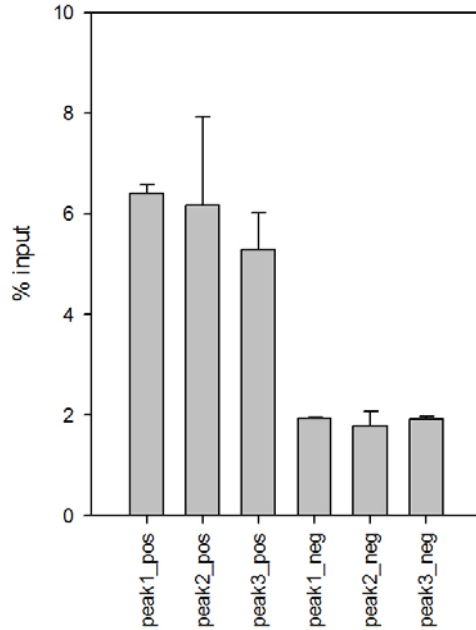

138

139 **Supplemental Figure 13: Verification of Peak calling.** In order to validate the peak calling  
 140 algorithm, three predicted peak (Peak\_pos) and adjacent non-peak (peak\_neg) regions were  
 141 chosen and primer sets to amplify these regions by qPCR were designed.

142

143

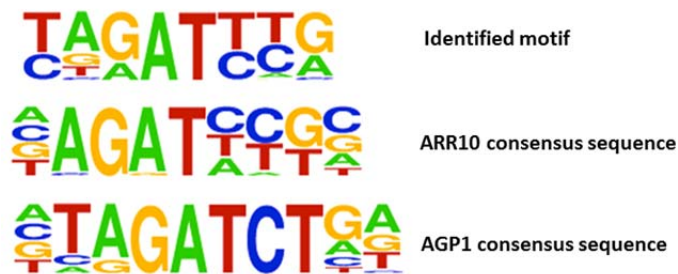

144

145 **Supplemental Figure 14: Motif analysis of H3K9/14ac peak regions.** Shown is the most  
 146 significant motif (P-value = E-168) and the ARR10 and AGP1 consensus sequences for  
 147 comparison. The identified motif strongly resembles the consensus sequences of both  
 148 transcription factors. The figure was prepared using the ChIPseek software portal  
 149 (<http://chipseek.cgu.edu.tw/>).

150

151

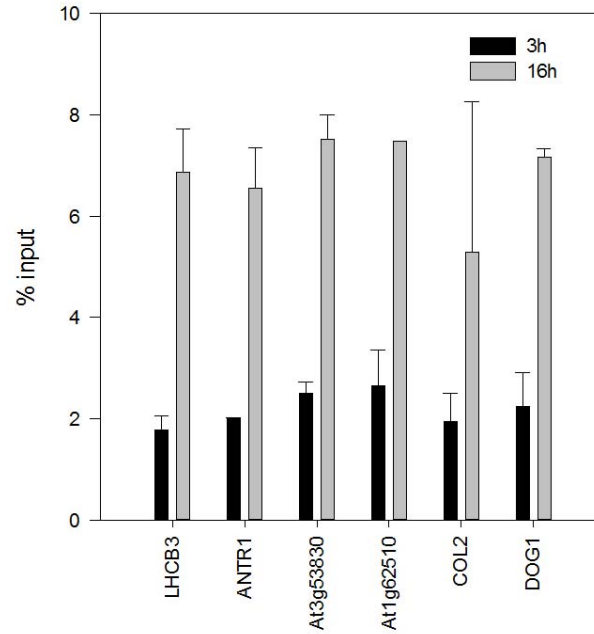

152

153 **Supplemental Figure 15: Verification of the quantitative analysis (DiffBind) by ChIP-**  
 154 **qPCR.** To verify the quantitative analysis, differentially regulated peaks in control\_3h vs.  
 155 control\_16h were identified. The predicted sites were then confirmed using qPCR and peak-  
 156 specific primer sets. All of the six candidates tested showed increased H3K9/14ac levels after  
 157 16h of treatment – as determined by DiffBind. Values are expressed as % of the input. Shown is  
 158 the data for two biological replicates, with two technical replicates each.

159

160

161

162

163

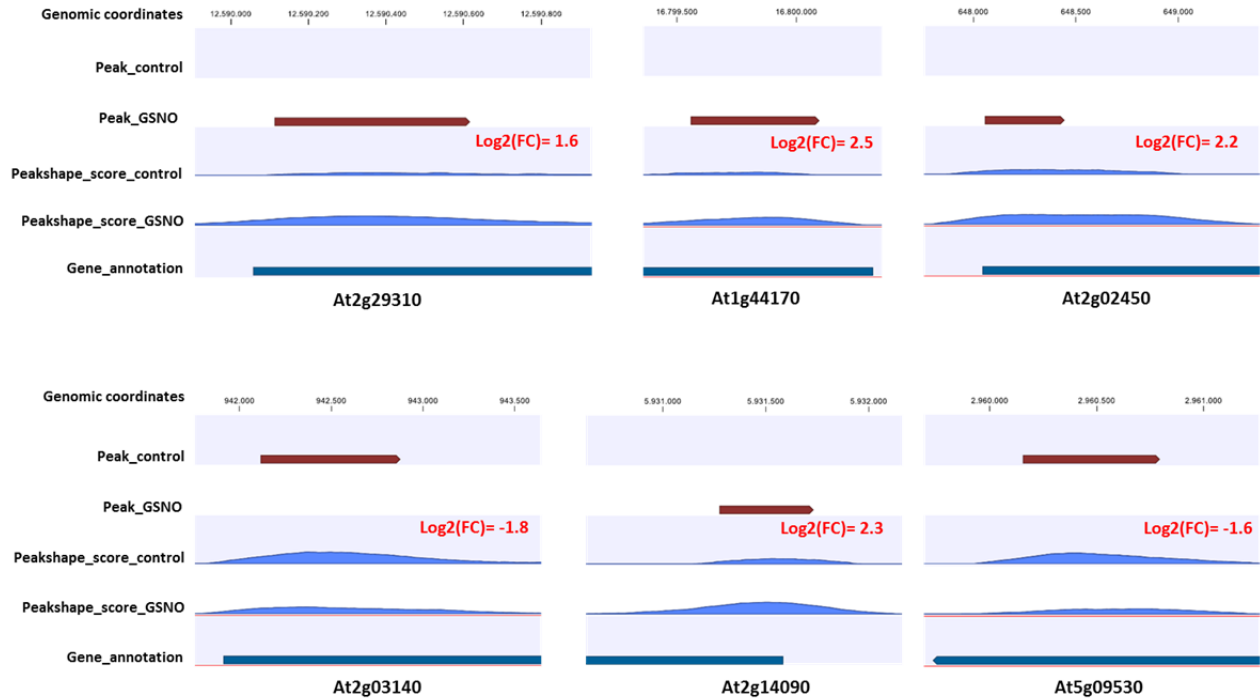

164

165 **Supplemental Figure 16: CLC-genome browser snapshots of representative GSNO-**  
 166 **regulated H3K9/14ac sites.** Brown arrows indicate whether a peak was found in this region  
 167 during peak-calling for water (second line: Peak\_control) or GSNO (third line: Peak\_GSNO)  
 168 treatment. The peak-shape score (fourth and fifth line) is a measure for how well the read  
 169 distribution fits to the peak shape filter applied for peak identification. The peak-shape score  
 170 correlates with the read density in the corresponding region. The numbers in red indicate the  
 171 predicted log<sub>2</sub> fold change (treatment-control) as computed by DiffBind.

172

173

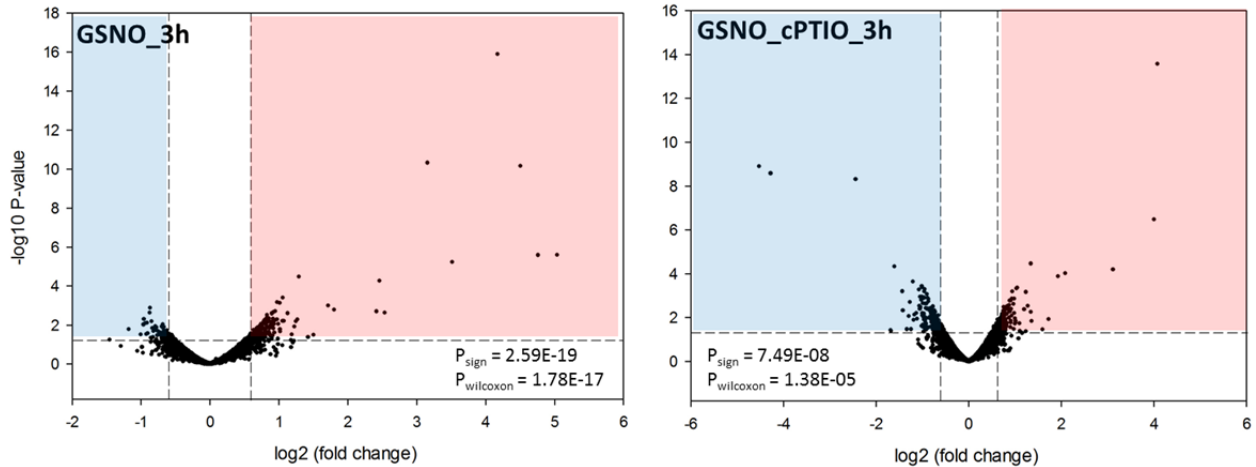

174

175 **Supplemental Figure 171: cPTIO reduces the number of hyperacetylated H3K9/14ac sites**  
 176 **after 3h of GSNO treatment.** Volcano plots in which the  $-\log_{10}(\text{P-value})$  of each analyzed  
 177 H3K9/14ac site is plotted versus the corresponding  $\log_2(\text{fold change (treatment over control)})$ .  
 178 The horizontal dashed line corresponds to a P-value of 0.05, the two vertical dashed lines mark  
 179 fold changes of  $\pm \log_2(1.5)$ . To test for significant differences in the number of peaks with  
 180 enhanced or decreased H3K9/14ac among the peaks with p-values  $< 0.05$ , sign-tests were  
 181 performed ( $P_{\text{sign}}$ ). To test whether peaks with increased H3K9/14ac show higher absolute  
 182  $\log_2(\text{fold changes})$  compared to peaks with decreased H3K9/14ac, Wilcoxon signed rank tests  
 183 were performed ( $P_{\text{wilcoxon}}$ ).

184

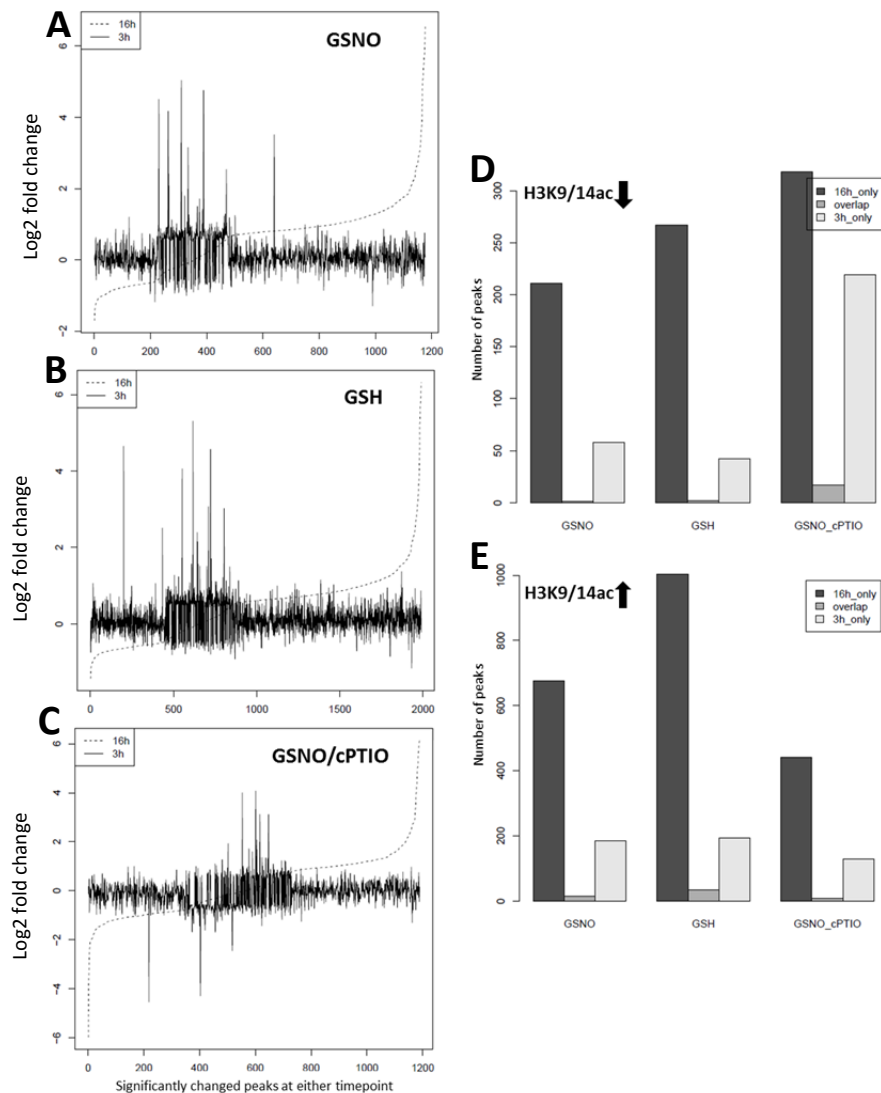

185

186 **Supplemental Figure 18: Time point comparison of GSNO -, GSH - and GSNO/cPTIO -**  
 187 **induced H3K9/14ac changes.** A – C: Peaks showing altered H3K9/14ac with  $P < 0.05$  in the 3h  
 188 or 16h time point were combined and sorted for increasing  $\log_2(\text{FC})$  in the 16h time point  
 189 (dotted line). The solid line reflects the  $\log_2(\text{FC})$  for the corresponding peaks after 3h of  
 190 treatment. These line-plots indicate that peaks which show strong H3K9/14ac changes in either  
 191 time point are not or only slightly regulated at the other time point arguing for substantially  
 192 different responses after 3h and 16h of treatment. D and E: Number of significantly changed  
 193 H3K9/14ac peaks ( $P < 0.05$ ), which are found after 16h or 3h only (dark grey and light grey bars)  
 194 or at both time points (grey bars) separated for peaks showing enhanced (E) or decreased  
 195 H3K9/14ac (D).



196

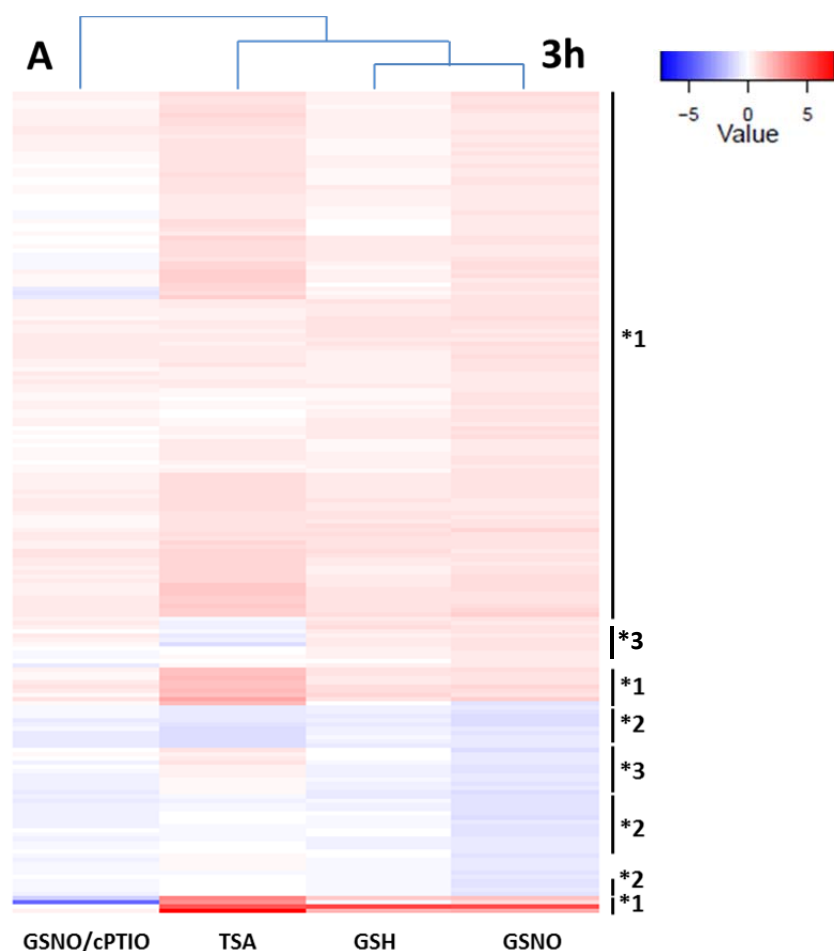

197

198 **Supplemental Figure 19: Comparison of NO-induced H3K9/14ac changes with the TSA**  
199 **treatment.** NO-regulated H3K9/14ac sites were identified by comparison of the GSNO and  
200 GSNO/cPTIO treatments (see text for details). Each line represents one NO-regulated  
201 H3K9/14ac site. The log<sub>2</sub>(FC) (treatment over control) of H3K9/14ac of these sites is shown for  
202 the GSNO, GSH, TSA and GSNO/cPTIO treatments. \*1: sites which show enhanced H3K9/14ac  
203 in response to NO and TSA treatment. 2\*: sites which show decreased H3K9/14ac in response to  
204 NO and TSA treatment. \*3: sites which are oppositely regulated in response to NO and TSA  
205 treatment.

206

207

208

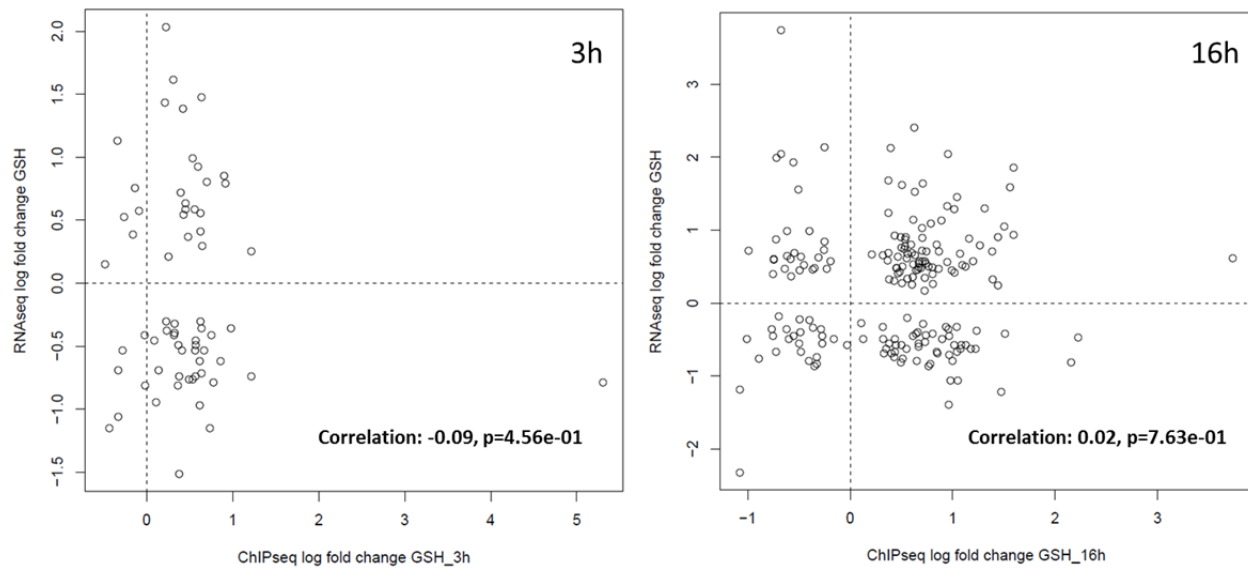

209

210 **Supplemental Figure 20: Correlation analysis of GSH-mediated changes of H3K9/14ac and**  
 211 **gene expression.** Correlation analysis of genes displaying GSH-mediated H3K9/14ac changes  
 212 after 3h (A) or 16h (B) and GSH-induced transcriptional changes (after 3h), based on a recently  
 213 published RNAseq dataset (Begara-Morales et al., 2014).

214

215

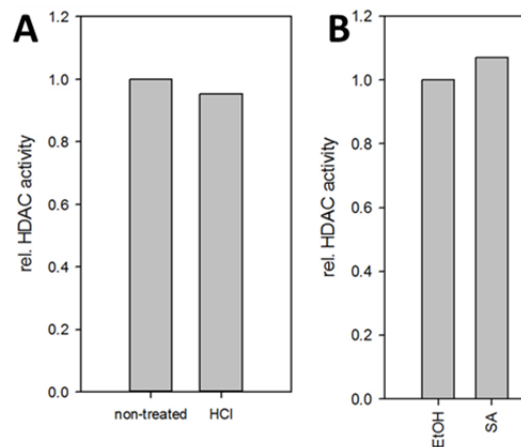

216

217 **Supplemental Figure 21: HDAC assay control experiments.** A) Protoplasts were incubated  
 218 with diluted HCl at a pH similar to a SA/INA solution and HDAC activity was determined. B)  
 219 Nuclear extracts were incubated with SA and HDAC activity was measured. The experiment was  
 220 repeated once with similar results.

221 **Supplemental Table 1: GO-enrichment analysis for genes displaying NO-regulated**  
 222 **H3K9/14ac.** GO terms with P-values < 0.01 are listed together with the corresponding ID, P-  
 223 value and FDR adjusted P-value (FDR). The “set” column indicates whether the GO term was  
 224 enriched among genes displaying increased histone acetylation after 3h (3h\_up) or 16h (16h\_up).  
 225 GO terms marked in bold belong to the category “biological process”. All other terms belong to  
 226 “molecular function”.

| <b>GO term</b>                                | <b>GO ID</b>      | <b>Set</b>    | <b>P-value</b> | <b>FDR</b>   |
|-----------------------------------------------|-------------------|---------------|----------------|--------------|
| small conjugating protein ligase activity     | GO:0019787        | 16h_up        | 0.0012         | 0.411        |
| sulfur compound binding                       | GO:1901681        | 16h_up        | 0.0037         | 0.641        |
| ligase activity                               | GO:0016874        | 16h_up        | 0.0061         | 0.683        |
| carbohydrate kinase activity                  | GO:0019200        | 16h_up        | 0.0082         | 0.683        |
| <b>defense response</b>                       | <b>GO:0006952</b> | <b>16h_up</b> | <b>0.0099</b>  | <b>0.683</b> |
| transcription from RNA polymerase II promoter | GO:0006366        | 3h_up         | 0.0006         | 0.134        |
| DNA modification                              | GO:0006304        | 3h_up         | 0.0008         | 0.134        |
| <b>response to cold</b>                       | <b>GO:0009409</b> | <b>3h_up</b>  | <b>0.0073</b>  | <b>0.709</b> |
| <b>organelle organization</b>                 | <b>GO:0006996</b> | <b>3h_up</b>  | <b>0.0083</b>  | <b>0.709</b> |

227  
 228  
 229  
 230  
 231  
 232  
 233  
 234  
 235  
 236  
 237  
 238  
 239

240 **Supplemental Table 2: Primer used for qPCR**

| name    | Sequence                  | name   | Sequence 5' → 3'         |
|---------|---------------------------|--------|--------------------------|
| HDA8_f  | AGCTGGTGGTTCCTGCAGTTA     | HD2A_f | TGAGCCACAAGGCTATTCTGAGG  |
| HDA8_r  | AAAGCGCTAGAGTCTTGACCAAC   | HD2A_r | AGCTACAGCCTTGCCAGCATTCC  |
| HDA19_f | TCTTGGGTGGTGGTGGTTACAC    | HD2B_f | TGTTCTGAAGCTGTTCTCTGCTC  |
| HDA19_r | TCCAAGTGCAACTCCAGTCTCG    | HD2B_r | AACAGCTGCTCCAGCATTTCGG   |
| HDA7_f  | TCGTTGCTGGTGTATGAGACG     | HD2C_f | ACGACGAAGAAGATGACTCCTCAG |
| HDA7_r  | ATTGCCTGGGAGATCATTGTCAAG  | HD2C_r | CTTTCTTGGGTCTTTCAGGCTTC  |
| HDA9_f  | ACTAGCCAGGGATCGACTAGGATG  | HD2D_f | TCTTCTCAAGCAGCCACATCTTCC |
| HDA9_r  | ATCCTCCACCTCCTGTAACCAG    | HD2D_r | TCCTGGCTTAATCTCGATACCC   |
| HDA10_f | TCACAGGACATGCTGAATGTGG    | Srt1_f | AGTTTCTGAACTGCATGGAGAC   |
| HDA10_r | AGTCTCAACGGTCCAACAACG     | Srt1_r | ACCTCGAAATCACGCAGGTACTC  |
| HDA14_f | ACCAACATATGCCACTTCAACGAC  | Srt2_f | CCGCCATTAACGACCTCTCAAGTG |
| HDA14_r | ACTAAAGCCATTCCGGCTCCTG    | Srt2_r | TTCGCGACGGAAACAATCTGTAG  |
| HDA5_f  | TCCTGTGGCGAGGGAATTTAAC    |        |                          |
| HDA5_r  | CCTTGTGCAAACTCCATCAGCTTC  |        |                          |
| HDA2_f  | ACCCATTCCGAAAGCAGGTTGG    |        |                          |
| HDA2_r  | ATCGCCATCCAAGTTCTGTTG     |        |                          |
| HDA15_f | GATTTGATGCGGCTAGAGGAGACC  |        |                          |
| HDA15_r | AATAGCCAGCCGGAGTCACATC    |        |                          |
| HDA18_f | GCAGCTGGATCTGTTGTAAAGGTG  |        |                          |
| HDA18_r | TCATCTGACTCGGCATGGTGTCT   |        |                          |
| HDA6_f  | AACCTCGCATCTGGAGTGGAAC    |        |                          |
| HDA6_r  | ATCTTACCAGGTAGAGTCCCTGTCT |        |                          |

241

242

243 **Supplemental Table 3: Primer used for ChIP-qPCR**

| name             | Sequence               | name             | Sequence 5' → 3'      |
|------------------|------------------------|------------------|-----------------------|
| Peak1_positive_f | TGCTACTCTCAATCCGACCC   | LHCB3_exon_f     | AACTCCGTCTTACCTCACCG  |
| Peak1_positive_r | GTGAGGTGAAGAACAGGGGA   | LHCB3_exon_r     | TCAGGGTCTGCGGATAAACCC |
| Peak1_negative_f | CACCTCTGCACAACCTTTCC   | ANTR1_exon_f     | GCGAATCAGAAACGACGTCA  |
| Peak1_negative_r | TGGGAAACTGAGGCTTGTGA   | ANTR1_exon_r     | TCCGGGTATTAGTTCGGAGC  |
| Peak2_positive_f | GCTGTGGATTGGTGGTTTT    | At3g53830_exon_f | TACTTACCAGGAGCTGCGTC  |
| Peak2_positive_r | CAGACAACCTTCAGCAACC    | At3g53830_exon_r | GAATCCACAACCACCACCAC  |
| Peak2_negative_f | TCTATGGAGAGAGGATTCGACG | At1g62510_exon_f | TTGGATGAGGGTGCAACATG  |
| Peak2_negative_r | CGCACTCGTTTTGGGACTC    | At1g62510_exon_r | CGGCCTACTAAACGTAACCC  |
| Peak3_positive_f | GAGCTCTCCAATGTGCAAG    | COL2_exon_f      | ACGAAGCAACCTCTCGATCA  |
| Peak3_positive_r | GCTAATAGAAAGACGCCGCC   | COL2_exon_r      | TTCCGCAAACCCACTAGCTA  |
| Peak3_negative_f | AAACCGATCGACCAAACCAC   | DOG1_exon_f      | CCCCACTCATGCATCGAAAG  |
| Peak3_negative_r | CCAGTCTGTGCATTTCCAAGA  | DOG1_exon_r      | ACAAGGAGCGGATTCTTCTG  |

244

245

246

247

248

249

250

251

252

253

254

255

256

257

258

259

260

261

262

263

264
